# Supplementary material for: A stable 1D helical silver coordination polymer with red emission
Source: Royal Society of Chemistry journal article supplement (doi:10.1039/c9py00362b), 2019-01-01
Supplement: c9py00362b1.pdf [file c9py00362b1.pdf]

# A Stable 1D Helical Silver Coordination Polymer with Red Emission

*Yuan Li, Shu-han Lu, Ruidun Zhao, Zhi-xiang Lu, Xiao-lan Liu, Yu Qin, Shao-xiong*

*Yang, Li-yan Zheng\* and Qiu-e Cao\**

Key Laboratory of Medicinal Chemistry for Natural Resource (Yunnan University),  
Ministry of Education, Functional Molecules Analysis and Biotransformation Key  
laboratory of Universities in Yunnan Province, School of Chemical Science and  
Technology, Yunnan University, Kunming, Yunnan 650091, P. R. China.

## Experimental section

**Materials and Physical Measurements.** Commercially available chemicals were purchased and used without further purification. Powder X-ray diffraction (PXRD) measurement was performed on a TTRIII X-ray diffractometer (Rigaku, Japan) with Cu K $\alpha$  radiation at 40 kV and 200 mA. FTIR spectra were recorded in the range 4000–400 cm<sup>-1</sup> on a Thermo Nicolet spectroscopy by using KBr pellets. Thermo gravimetric analysis (TGA) was performed on a NETZSCH STA 449F3 instrument with the heating rate of 10 °C min<sup>-1</sup> under a nitrogen atmosphere. Microscope image of the crystal was performed on OLYMPUS-DP80. X-ray single crystal diffraction measurement was performed on Bruker APEX-II CCD (Cu X-ray source). Fluorescent lifetime was measured on an Edinburgh FLS980 fluorescence spectrometer equipped. <sup>1</sup>H-NMR spectra were measured on a Bruker spectrometer (400 MHz) at 25 °C in CDCl<sub>3</sub>. All calculations were performed using the Gaussian 09 program. All the structures were completely optimized using a combined basis set: the LanL2DZ basis set was used for Ag along with the 6-31G(d) basis set for C, N, H, F, S, and O. To avoid complexity, we treated Ag-Bz as a truncated segment containing one Ag<sub>5</sub>(CF<sub>3</sub>COO)(Bz)(S<sup>t</sup>Bu)<sub>4</sub> unit.

**Synthesis of AgS<sup>t</sup>Bu.** AgS<sup>t</sup>Bu was prepared according to published protocols<sup>1</sup>.

**Synthesis of Ag-Bz.** AgS<sup>t</sup>Bu (0.1086 g, 0.55 mmol), CF<sub>3</sub>COOAg (0.0607 g, 0.28 mmol) and benzimidazole (0.0590 g, 0.5 mmol) were dissolved in a mixed solvent 1mL

of MeOH: DMF =1:1 under ultrasonic. The obtained solution was slowly evaporated in air at room temperature to give needle-like colorless crystals that were rinsed with EtOH, filtered and dried in air to produce Ag-Bz with a 55% yield based on silver element.

**Crystal Data Collection and Refinement.** The crystal data of Ag-Bz was collected on a Bruker APEX-III CCD diffractometer at room temperature using Cu K $\alpha$  radiation ( $\lambda = 1.54178 \text{ \AA}$ ). The structure was resolved and refined using the SHELX-97 software. Crystal data was listed in Table S1. Crystallographic data were deposited in the Cambridge Structural Date Centre (CCDC) and can be obtained free of charge at <http://www.ccdc.cam.ac.uk/> by using reference numbers 1859816.

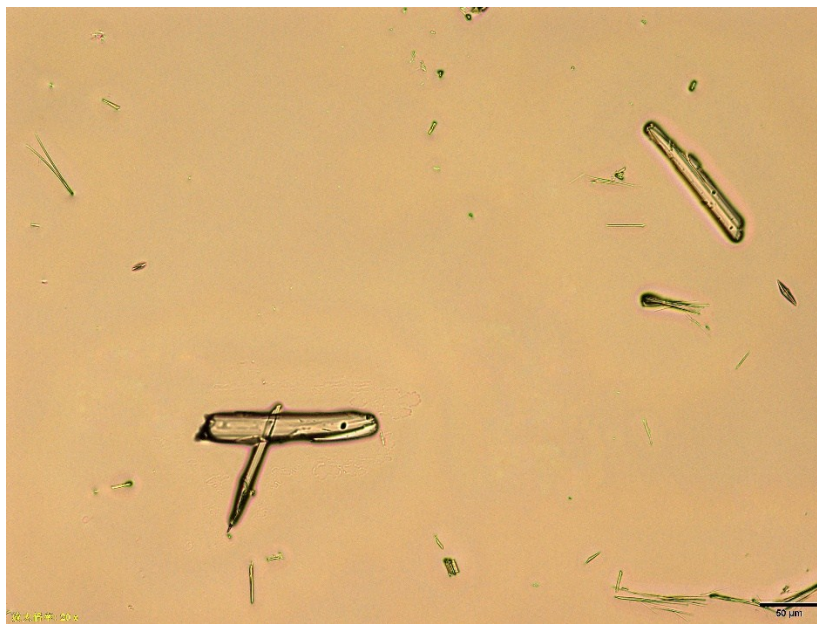

**Figure S1.** Microscope image of the crystal. (magnification is 20)

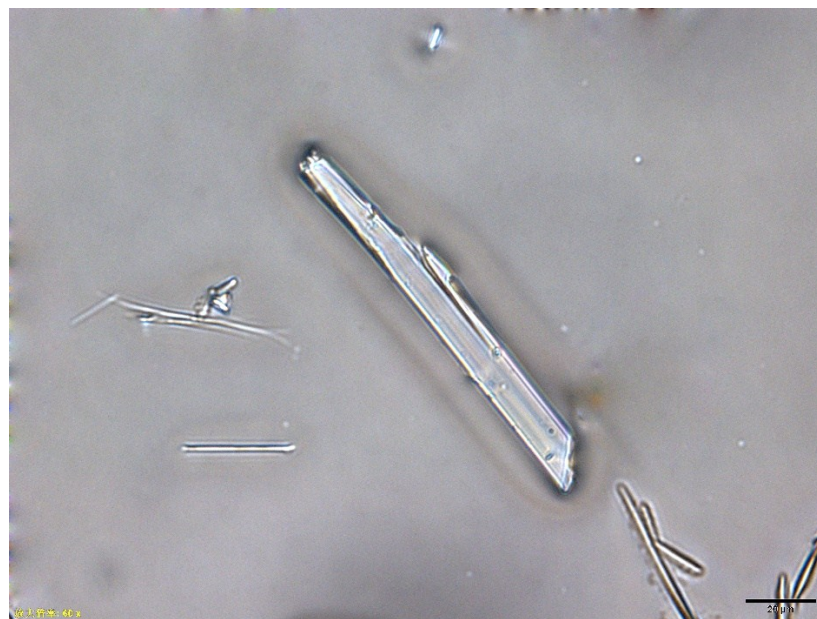

**Figure S2.** Microscope image of the crystal. (magnification is 60)

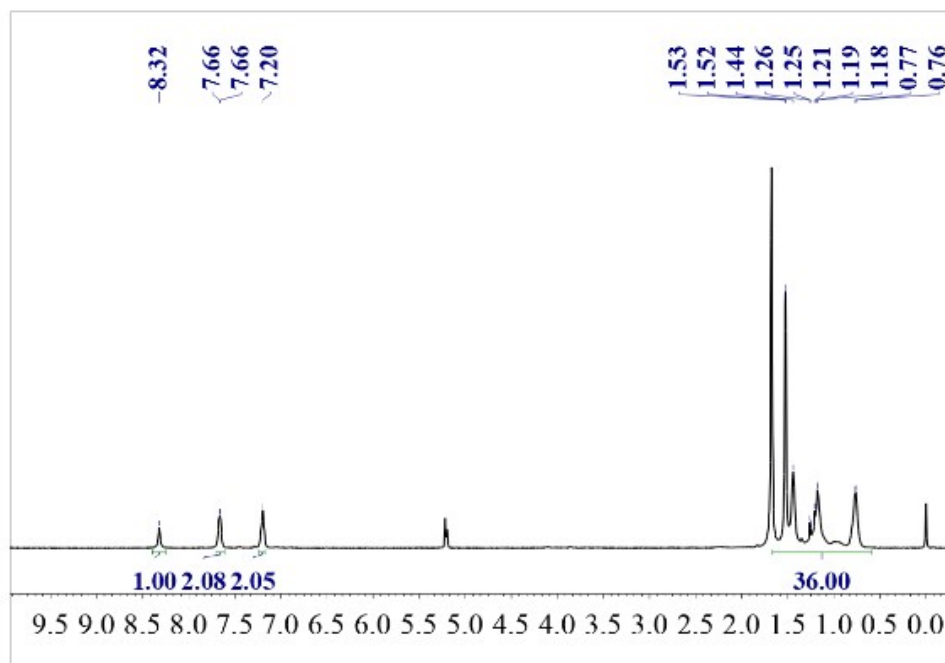

**Figure S3.**  $^1\text{H}$ NMR of Ag-Bz in  $\text{CDCl}_3$ .

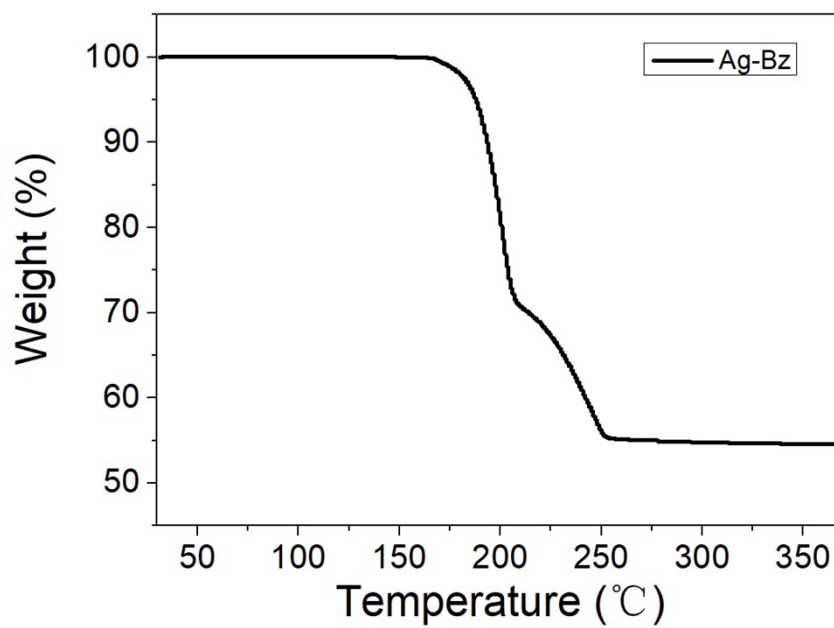

**Figure S4.** TGA spectrum of Ag-Bz powder.

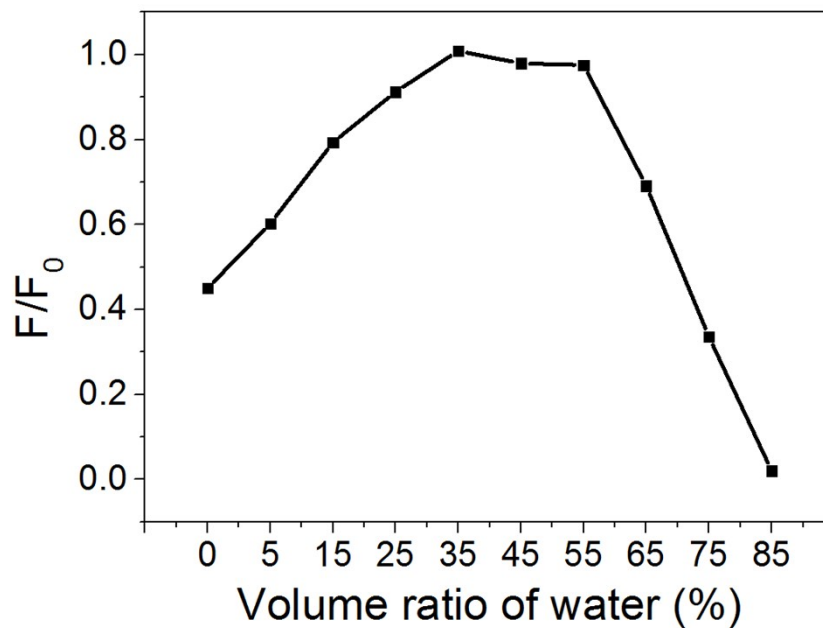

**Figure S5.** Plots of relative PL intensity of Ag-Bz at different water partial volume (excitation at 548 nm).

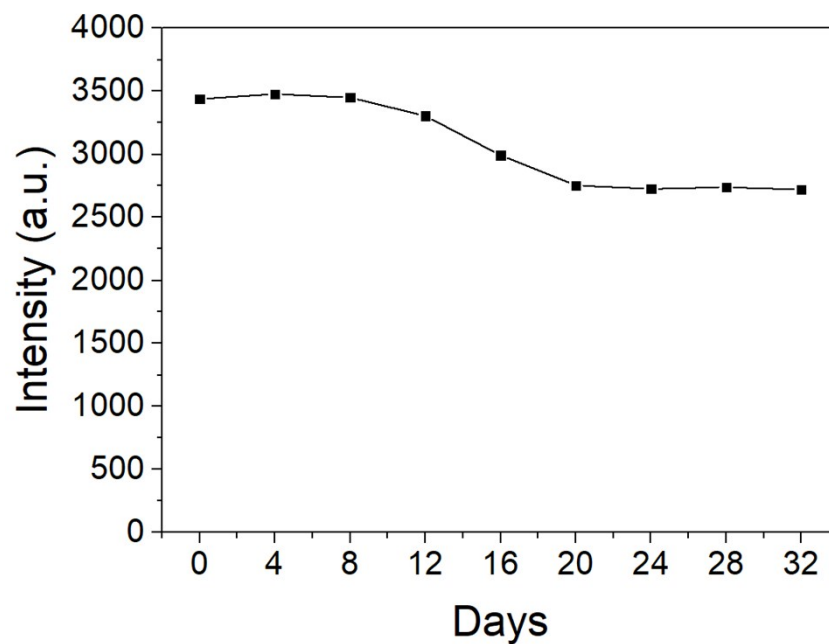

**Figure S6.** The stability of fluorescent intensity of Ag-Bz.

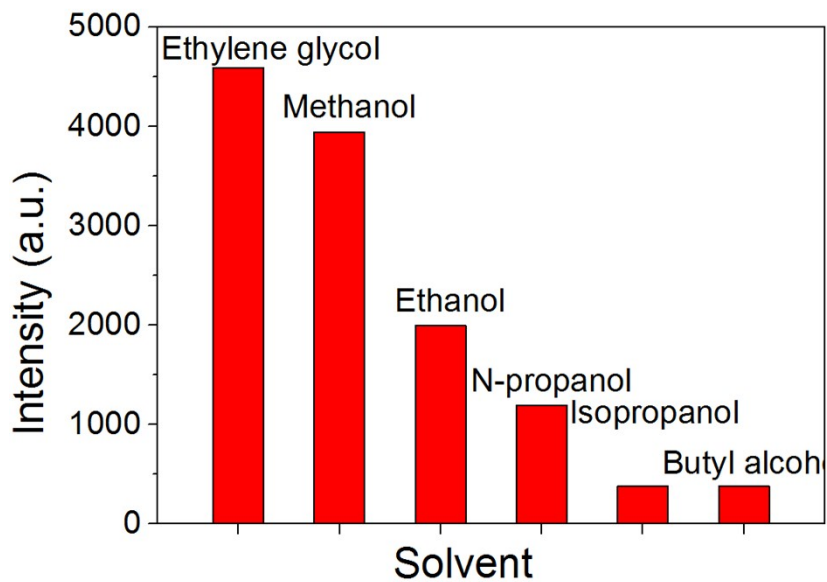

Figure S7. Fluorescent intensity of Ag-Bz in different solutions.

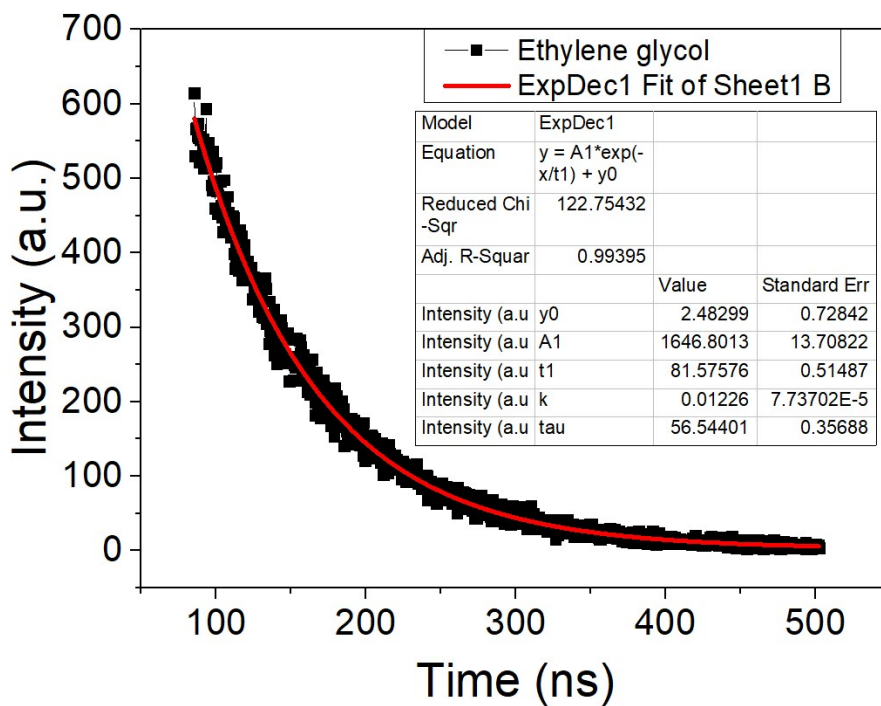

Figure S8. Fluorescent lifetime of Ag-Bz in ethylene glycol.

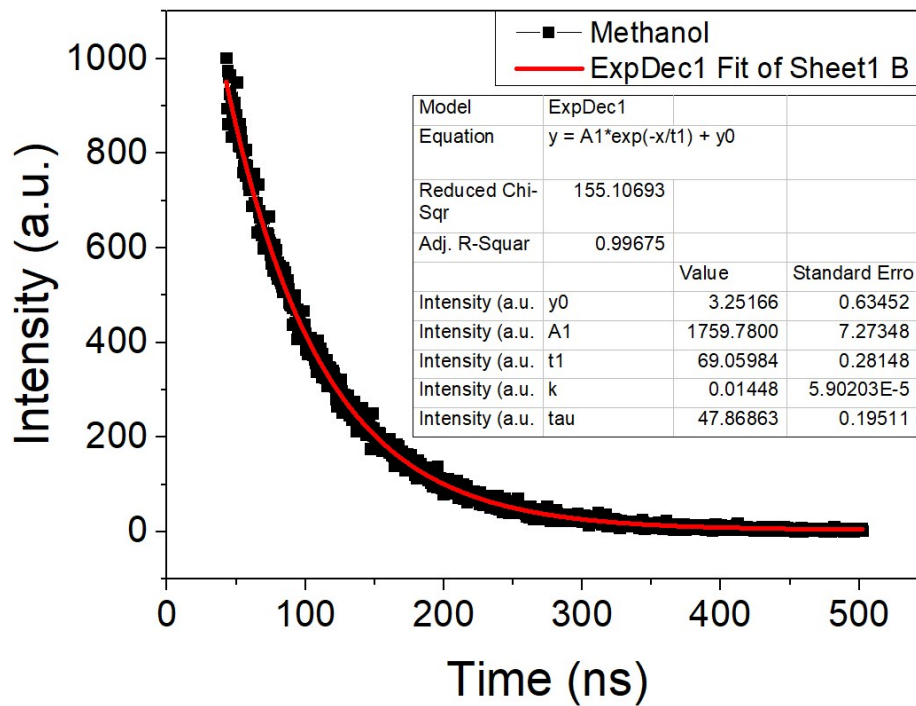

**Figure S9.** Fluorescent lifetime of Ag-Bz in methanol.

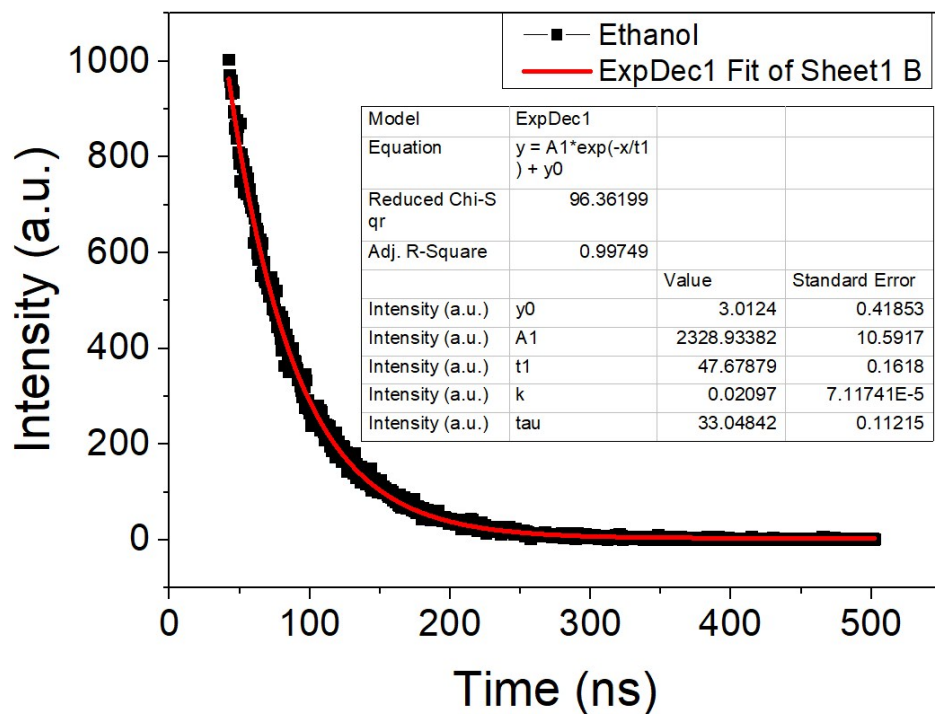

**Figure S10.** Fluorescent lifetime of Ag-Bz in ethanol.



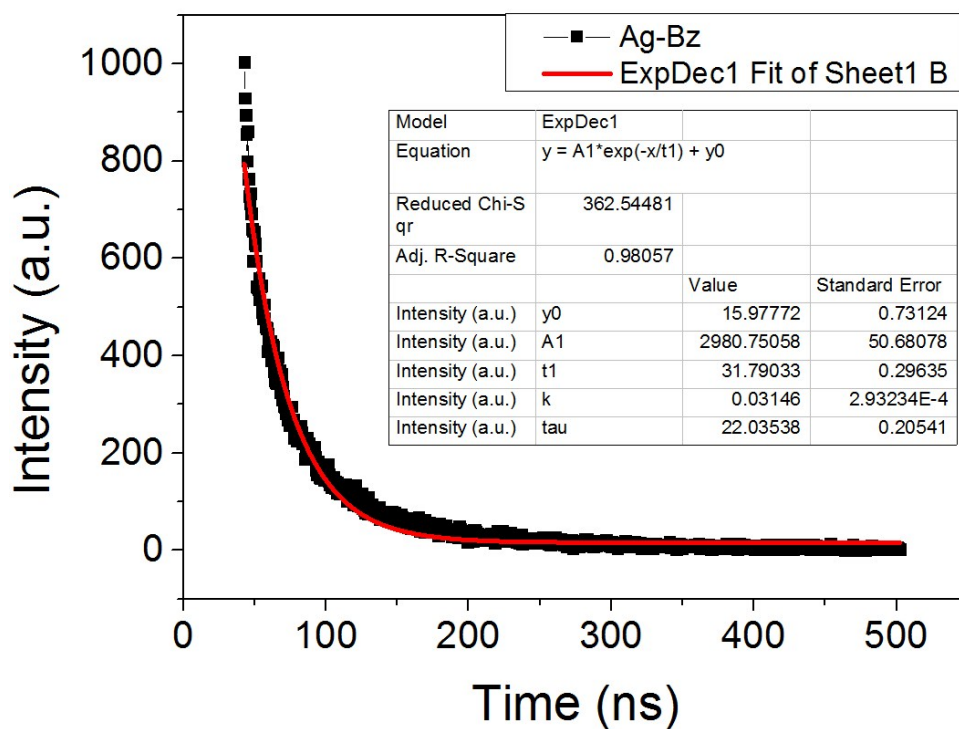

Figure S11. Fluorescent lifetime of Ag-Bz in solid state.

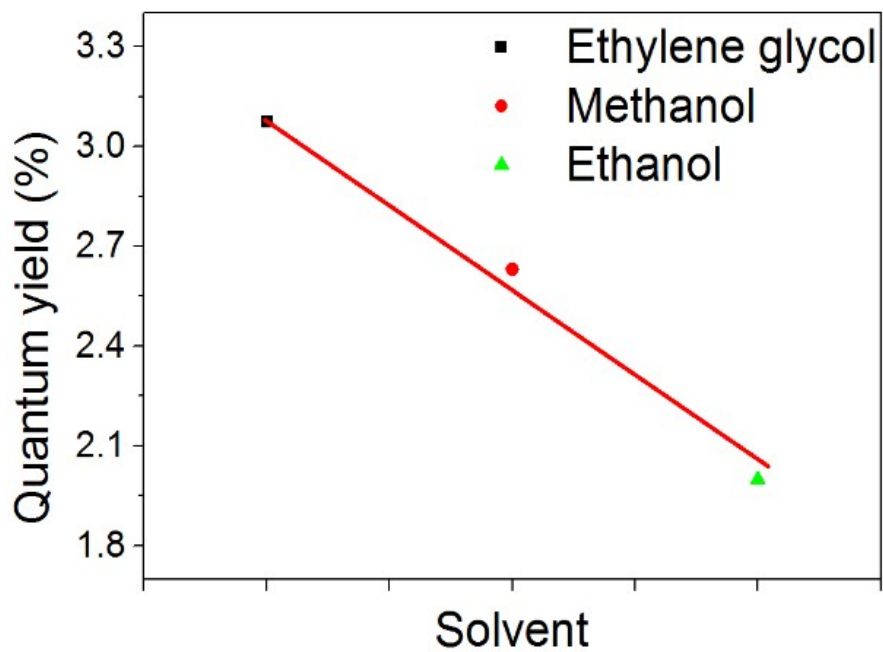

Figure S12. Fluorescence quantum yield of Ag-Bz in different solution.

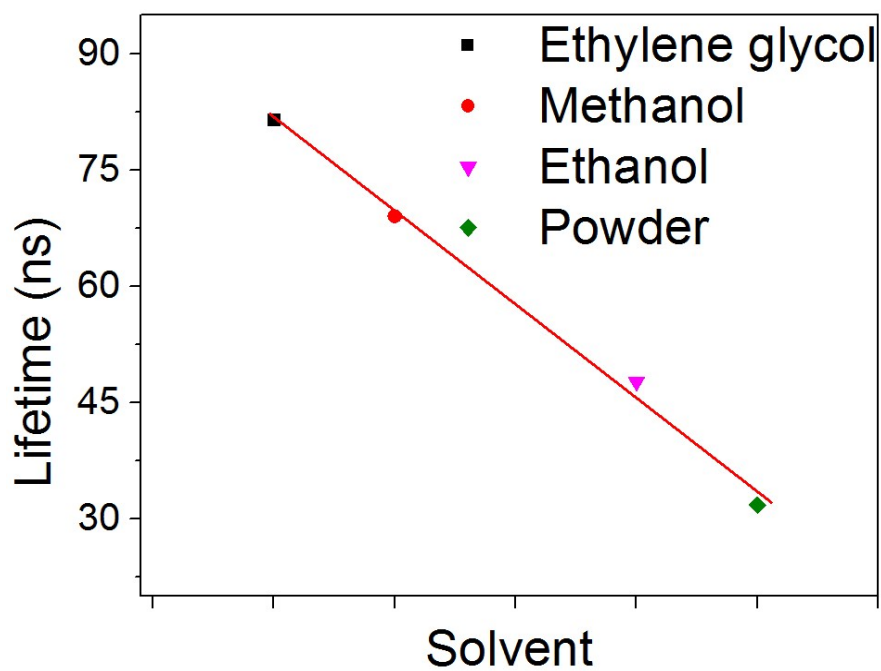

**Figure S13.** Fluorescent lifetime of Ag-Bz in different solvent.

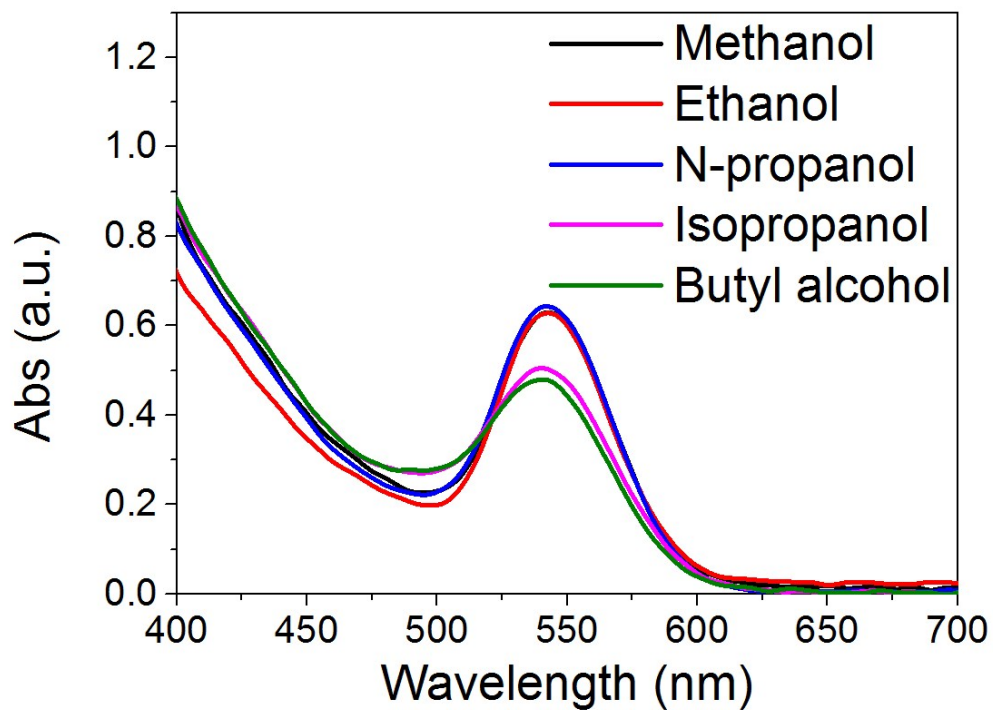

**Figure S14.** UV/Vis absorption of Ag-Bz indifferent alcohol solution.

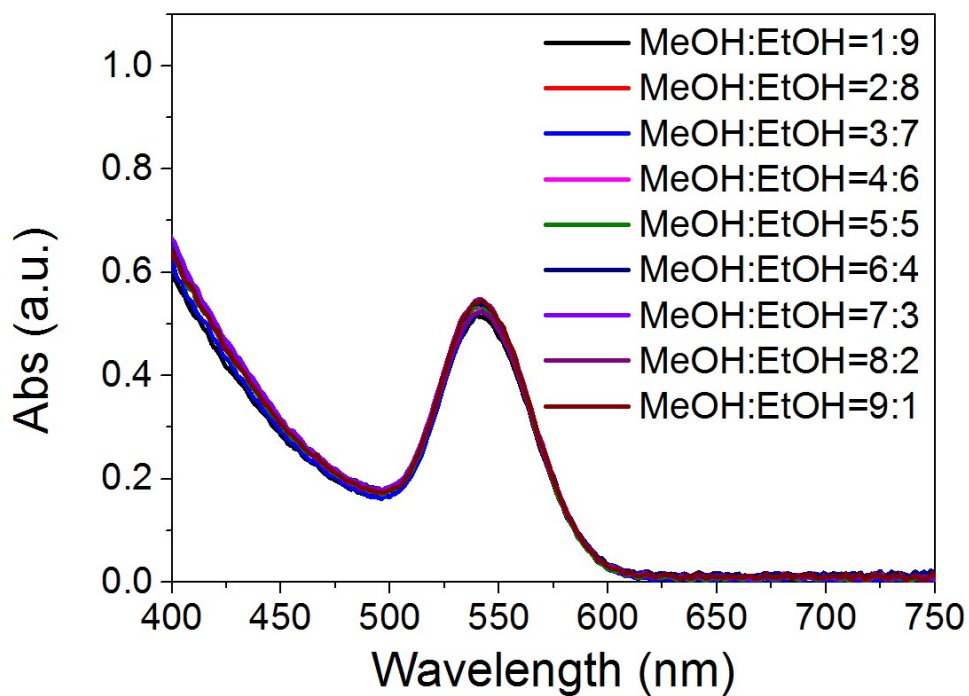

**Figure S15.** UV/Vis absorption of Ag-Bz in MeOH/EtOH mixed solution.

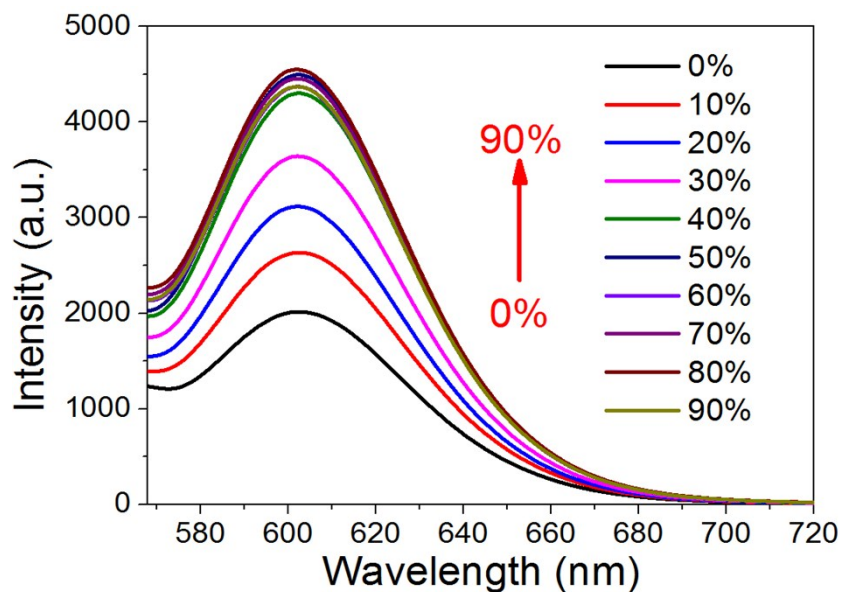

**Figure S16.** Fluorescent emission spectra of Ag-Bz at different MeOH partial volume (excitation at 548 nm) in the EtOH mixture.

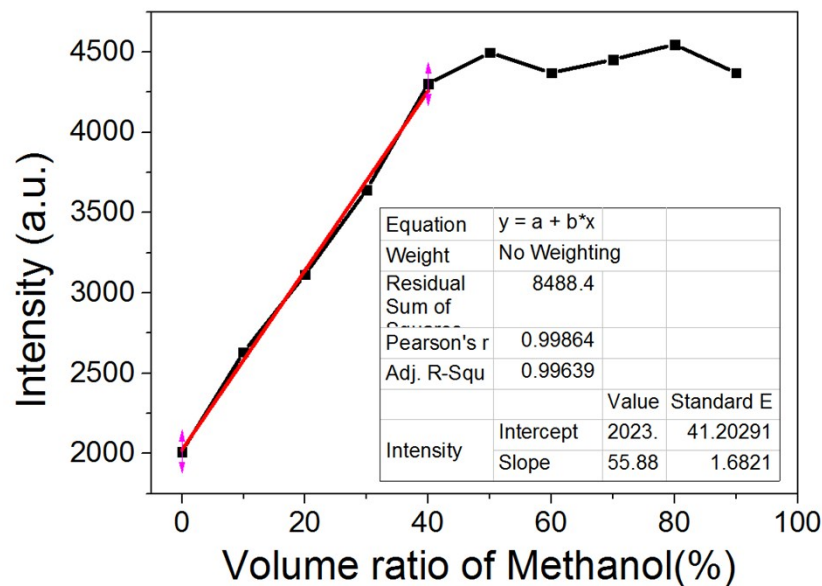

**Figure S17.** Plots of relative PL intensity of Ag-Bz at different MeOH partial volume (excitation at 548 nm) in the EtOH mixture.

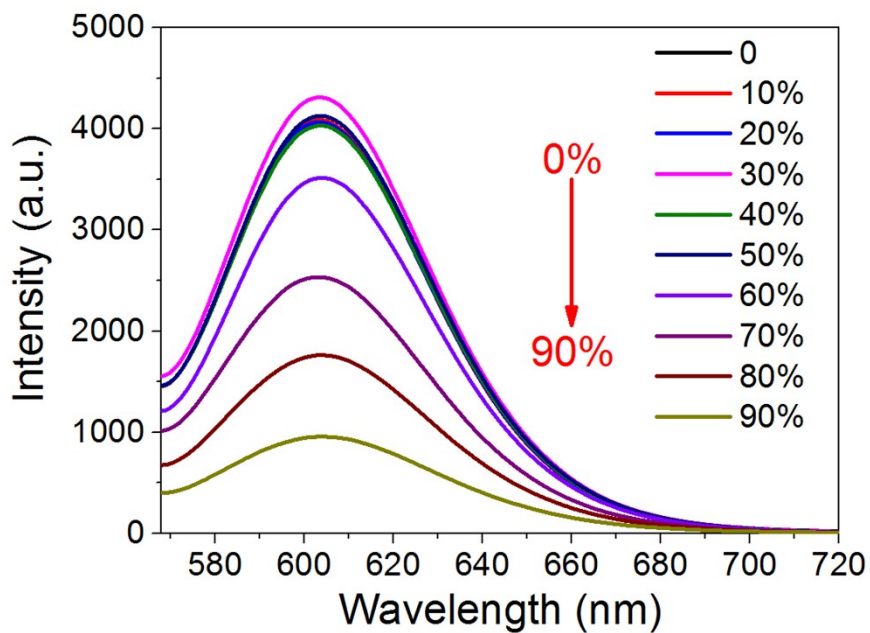

**Figure S18.** Emission spectra of Ag-Bz at different butyl alcohol partial volume (excitation at 548 nm) in the MeOH mixture.

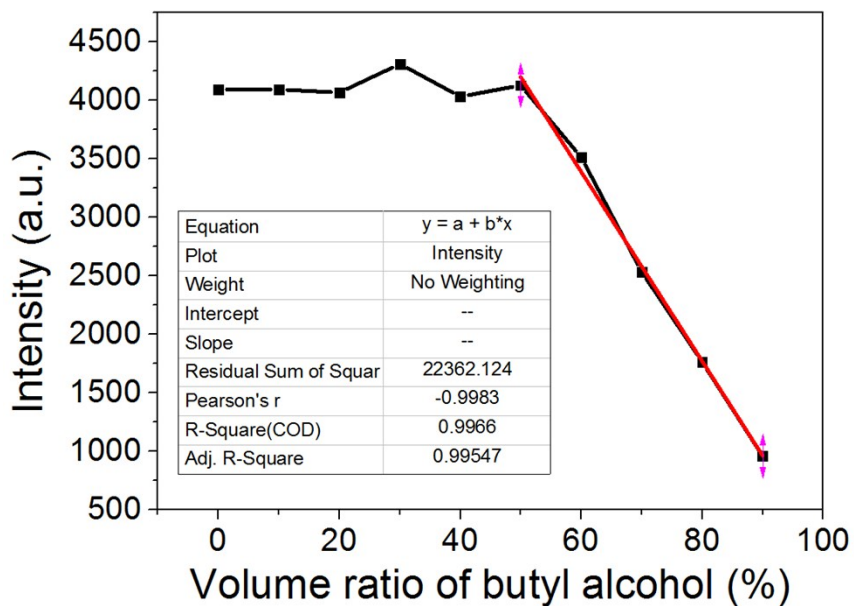

**Figure S19.** Emission spectra and Plots of relative PL intensity of Ag-Bz at different butyl alcohol partial volume (excitation at 548 nm) in the MeOH mixture.

**Supplementary Table:**

**Table S1.** Crystal data and structure refinement for Ag-Bz.

|                     |                                |
|---------------------|--------------------------------|
| Identification code | Ag-Bz                          |
| Empirical formula   | $C_{25}H_{42}Ag_5F_3N_2O_2S_4$ |
| Formula weight      | 1127.19                        |
| Temperature/K       | 235.0                          |
| Crystal system      | monoclinic                     |
| Space group         | $P2_1/c$                       |
| a/Å                 | 12.2226(4)                     |

|                                       |            |
|---------------------------------------|------------|
| b/Å                                   | 24.7501(8) |
| c/Å                                   | 12.0798(4) |
| $\alpha$ /°                           | 90         |
| $\beta$ /°                            | 102.123(2) |
| $\gamma$ /°                           | 90         |
| Volume/Å <sup>3</sup>                 | 3572.8(2)  |
| Z                                     | 4          |
| $\rho_{\text{calc}}$ /cm <sup>3</sup> | 2.096      |
| $\mu$ /mm <sup>-1</sup>               | 24.138     |
| F(000)                                | 2192.0     |

**Table S2.** MALDI-TOF-MS data of Ag-Bz solution.

| Assignment                                                                                           | Exp.     | Sim.     |
|------------------------------------------------------------------------------------------------------|----------|----------|
| $[\text{Ag}_5(\text{CF}_3\text{COO})(\text{S}^t\text{Bu})_4(\text{Bz})(\text{MeOH})_3+\text{H}]^+$   | 1224.606 | 1224.333 |
| $[\text{Ag}_5(\text{CF}_3\text{COO})_2(\text{S}^t\text{Bu})_4(\text{Bz})(\text{MeCN})+\text{H}]^+$   | 1281.669 | 1281.267 |
| $[\text{Ag}_6(\text{CF}_3\text{COO})(\text{S}^t\text{Bu})_4(\text{Bz})_2(\text{MeOH})_3+\text{H}]^+$ | 1443.841 | 1443.459 |

**Table S3.** FL data of Ag-Bz in different solution.

|                 | Em (nm) | Quantum yield (%) | Lifetimes (ns) |
|-----------------|---------|-------------------|----------------|
| EtOH            | 603     | 2.000             | 47.67891       |
| MeOH            | 603     | 2.631             | 69.05984       |
| Ethylene glycol | 603     | 3.077             | 81.57576       |

### References

1. B. Li, R.-W. Huang, J.-H. Qin, S.-Q. Zang, G.-G. Gao, H.-W. Hou and T. C. W. Mak, *Chemistry – A European Journal*, 2014, **20**, 12416-12420.
